# Supplementary material for: Measurement report: Seasonality, distribution and sources of organophosphate esters in PM 2.5 from an inland urban city in Southwest China
Source: Copernicus journal article supplement (doi:10.5194/acp-20-14933-2020), 2020-12-03
Supplement: Supplementary file 1 [file acp-20-14933-2020-supplement.pdf]

Supplement of Atmos. Chem. Phys., 20, 14933–14945, 2020  
<https://doi.org/10.5194/acp-20-14933-2020-supplement>  
© Author(s) 2020. This work is distributed under  
the Creative Commons Attribution 4.0 License.

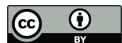

*Supplement of*

**Measurement report: Seasonality, distribution and sources  
of organophosphate esters in PM<sub>2.5</sub> from an inland urban  
city in Southwest China**

**Hongling Yin et al.**

*Correspondence to:* Hongling Yin (yhl@cuit.edu.cn)

The copyright of individual parts of the supplement might differ from the CC BY 4.0 License.

## Supporting Information

**Table S1.** Results of principal component factor load matrix.

| OPEs  | Factors |       |
|-------|---------|-------|
|       | 1       | 2     |
| TnBP  | 0.044   | 0.861 |
| TCEP  | 0.871   | 0.230 |
| TCPP  | 0.785   | 0.171 |
| TDCPP | 0.580   | 0.246 |
| TPhP  | 0.250   | 0.688 |
| TBEP  | 0.766   | 0.055 |
| TEHP  | 0.239   | 0.765 |

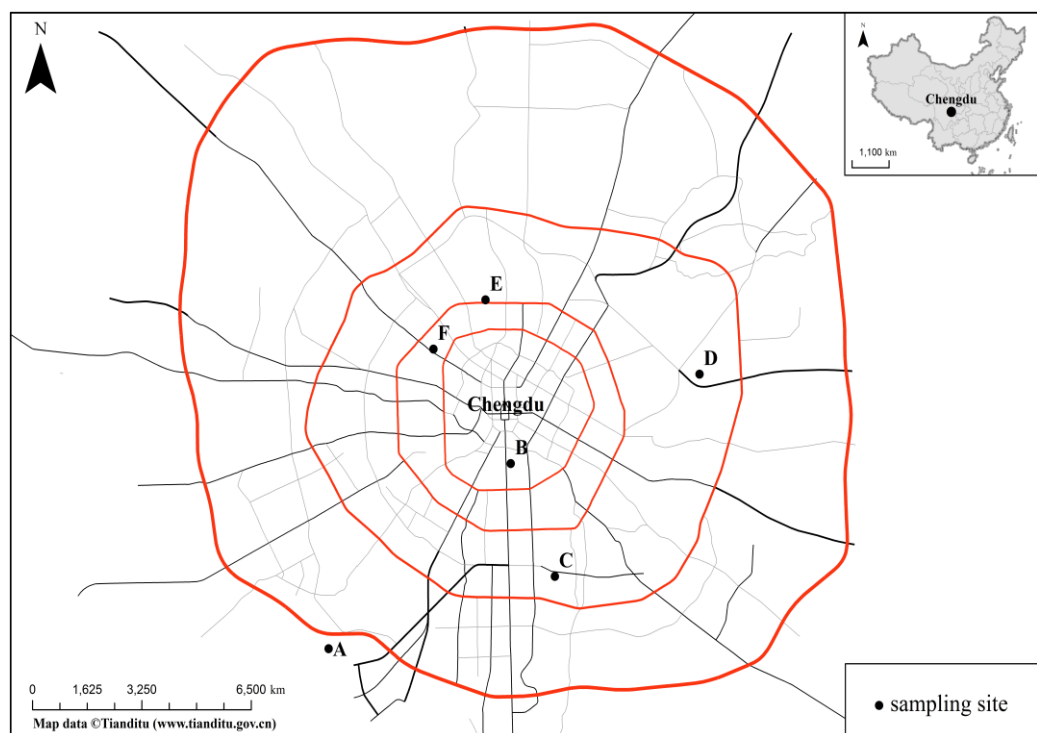

**Figure S1.** Location of sampling sites.

Map data ©Tianditu (www.tianditu.gov.cn)

( A, E30°35'2", N103°59'28". B, E30°38'40", N104°3'57". C, E30°36'27", N104°5'2". D, E30°40'25", N104°8'36".

E, E30°41'53", N104°3'20". F, E30°40'55", N104°2'3". )

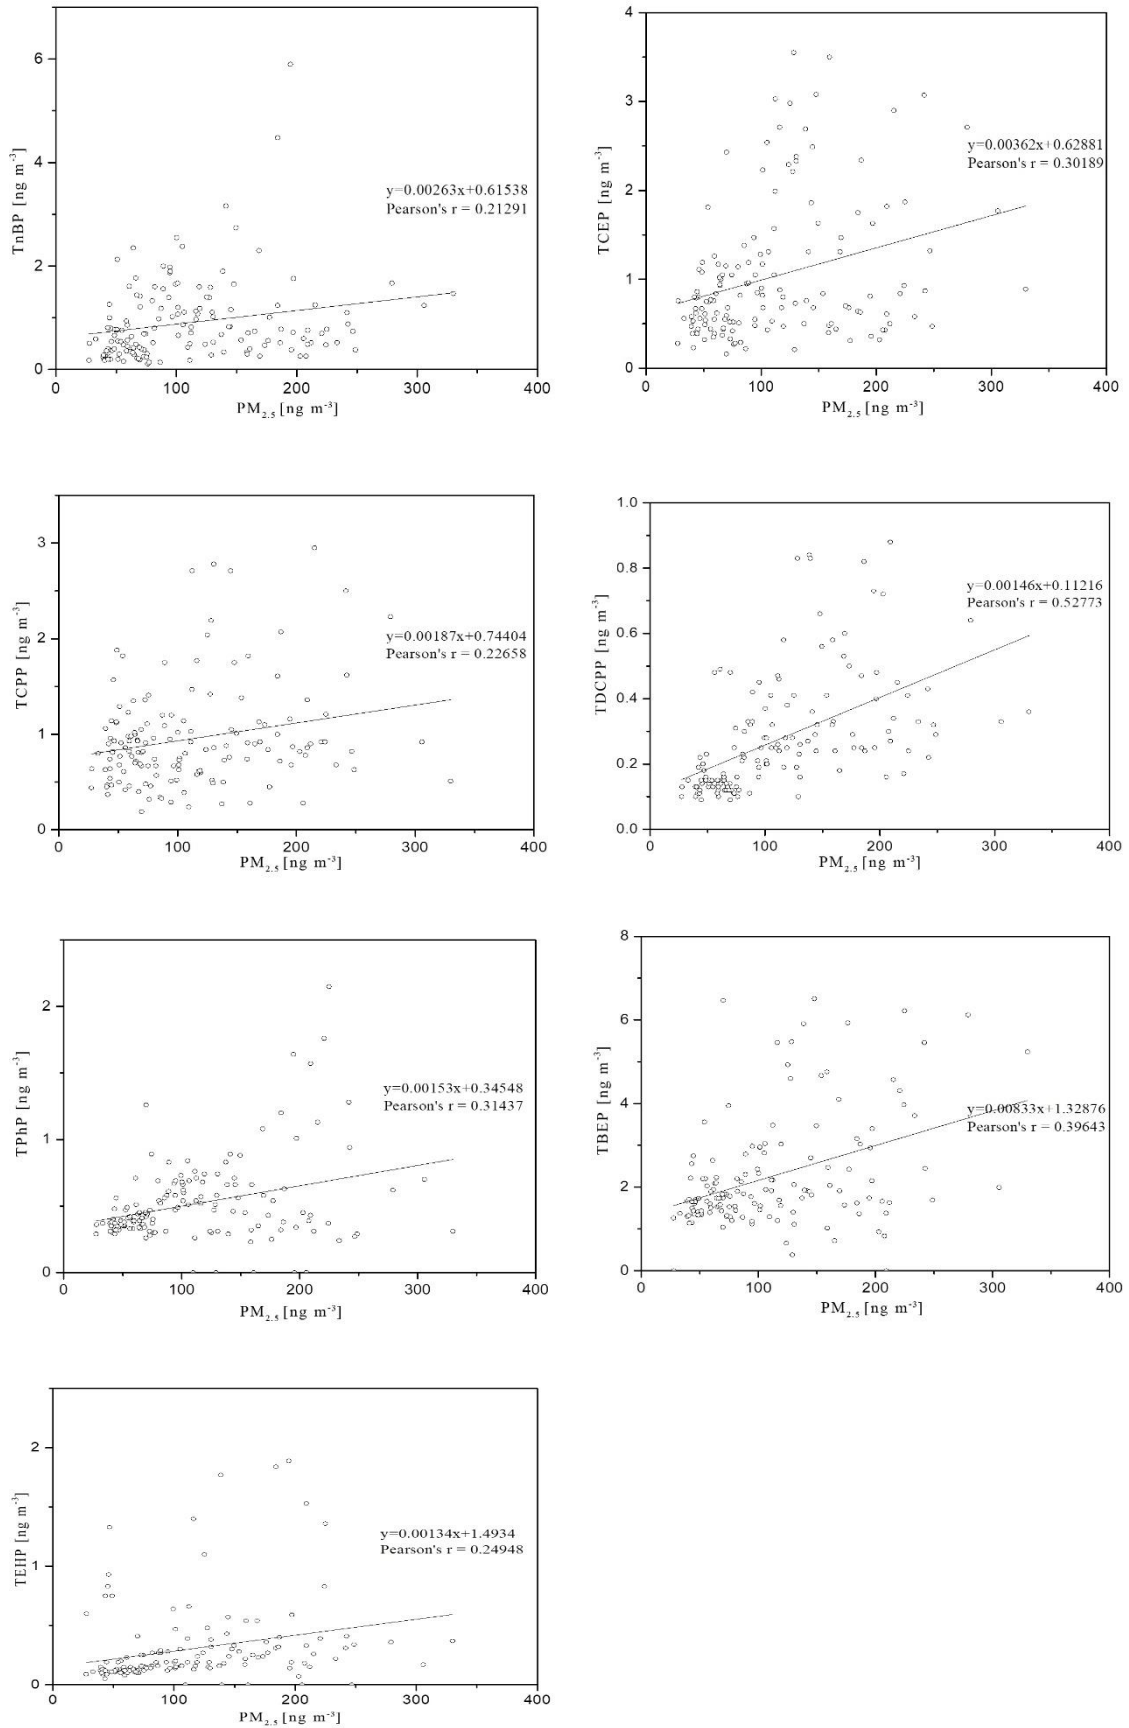

Figure S2. Scatter plot of OPEs and PM<sub>2.5</sub>.
